# Supplementary material for: Profiling Complement System Components in Primary CNS Vasculitis
Source: MDPI journal article supplement (doi:10.3390/cells10051139), 2021-05-08
Supplement: s1 [file s1]

## Supplementary File

**Table S1. Clinical vignettes of patients with PACNS**

| Pat | Age (yrs.) | Symptoms                                            | MRI/DBI                                                   | CSF                                                                                                             | DSA/ MRA                                                                          | Biopsy | Disease course   | Immunosuppressive Treatment* |
|-----|------------|-----------------------------------------------------|-----------------------------------------------------------|-----------------------------------------------------------------------------------------------------------------|-----------------------------------------------------------------------------------|--------|------------------|------------------------------|
| 1   | 33         | Dizziness, hemianopsia, left-sided paresthesia      | Multifocal ischemic stroke lesions<br>DBI: pos            | WBC 3/3 / $\mu$ l,<br>Pro: 350 mg/l<br>OCB: neg.,<br>Cyto: N.p.                                                 | Multifocal irregular alternating stenosis/ occlusions and dilatations             | N.p.   | Active (Onset)   | None                         |
| 2   | 41         | Headache, seizures, left-sided hemiparesis          | Contrast-enhanced lesion of the frontal lobe<br>DBI: N.p. | WBC 2/3 / $\mu$ l,<br>Pro: 643 mg/l,<br>OCB: neg,<br>Cyto: No pathologies                                       | No pathologies                                                                    | Pos.   | Active (Onset)   | None                         |
| 3   | 26         | Headache, left-sided arm paresis                    | Multifocal ischemic stroke lesions<br>DBI: neg.           | WBC 64/3 / $\mu$ l,<br>Pro: 324 mg/l,<br>OCB: neg.,<br>Cyto: lymphomonocytic pleocytosis                        | Multifocal irregular alternating stenosis/ occlusions and dilatations             | N.p.   | Active (Onset)   | None                         |
| 4   | 59         | Right-sided hemiparesis, dysarthria                 | Multifocal ischemic stroke lesions<br>DBI: pos            | WBC 32/3,<br>Pro: 400mg/l<br>intrathecal IgM>IgA-synthesis,<br>OCB: neg.,<br>Cyto: lymphomonocytic pleocytosis, | Multifocal irregular alternating stenosis/ occlusions and dilatations             | N.p.   | Active (Onset)   | None                         |
| 5   | 26         | Left-sided hemiparesis                              | New ischemic stroke on the right side<br>DBI: pos         | WBC 4/3 / $\mu$ l,<br>Pro: 258 mg/l<br>OCB: neg.,<br>Cyto: No pathologies                                       | Progressive multifocal irregular alternating stenosis/ occlusions and dilatations | N.p.   | Active (Relapse) | Cortisone, RTX               |
| 6   | 38         | Headache, double vision, left-sided hemiparesis     | New ischemic stroke on the right side<br>DBI: pos         | WBC 6/3 / $\mu$ l,<br>Pro: 611 mg/l,<br>OCB: neg.,<br>Cyto: No pathologies                                      | Multifocal irregular alternating stenosis/ occlusions and dilatations             | Pos.   | Active (Onset)   | None                         |
| 7   | 55         | Aphasia, dysarthria, facial palsy on the right side | New ischemic stroke on the left side                      | WBC 176/3 / $\mu$ l,<br>Pro: 584 mg/l,<br>OCB: 2 isolated bands, identical                                      | Progressive multifocal irregular alternating stenosis/                            | N.p.   | Active (Relapse) | Cortisone, CYC, RTX          |

|    |    |                                                                                                 |                                                                |                                                                                                                                 |                                                                                                                    |      |                     |                                                                  |
|----|----|-------------------------------------------------------------------------------------------------|----------------------------------------------------------------|---------------------------------------------------------------------------------------------------------------------------------|--------------------------------------------------------------------------------------------------------------------|------|---------------------|------------------------------------------------------------------|
|    |    |                                                                                                 | DBI: neg.                                                      | bands, Cyto:<br>lymphomonocytic<br>pleocytosis                                                                                  | occlusions<br>and<br>dilatations                                                                                   |      |                     |                                                                  |
| 8  | 55 | Left-sided<br>hemi-paresis                                                                      | New<br>ischemic<br>stroke on<br>the left<br>side<br>DBI: N.p.  | WBC 14/3 / $\mu$ l,<br>Pro: 352 mg/l,<br>intrathecal<br>IgM-synthesis,<br>OCB: neg.,<br>Cyto:<br>lymphomonocytic<br>pleocytosis | Progressive<br>multifocal<br>irregular<br>alternating<br>stenosis/<br>occlusions<br>and<br>dilatations             | Neg. | Active<br>(Relapse) | Cortisone,<br>CYC, MTX                                           |
| 9  | 47 | Headache ,<br>right-sided<br>hemiparesis                                                        | New<br>ischemic<br>stroke on<br>the right<br>side<br>DBI: Neg. | WBC 7/3 / $\mu$ l,<br>Pro: 452 mg/l<br>OCB neg,<br>Cyto: No<br>pathologies                                                      | Progressive<br>multifocal<br>irregular<br>alternating<br>stenosis/<br>occlusions<br>and<br>dilatations             | Neg. | Active<br>(Relapse) | Cortisone,<br>CYC, Aza                                           |
| 10 | 45 | Double vision,<br>dizziness,<br>nausea,<br>paresthesia on<br>the right hand                     | New<br>ischemic<br>stroke in<br>the<br>brainstem<br>DBI: Neg.  | WBC 120/3 / $\mu$ l,<br>575 mg/l Prot,<br>OCB: neg,<br>Cyto:<br>lymphomonocytic<br>pleocytosis                                  | Progressive<br>multifocal<br>irregular<br>alternating<br>stenosis/<br>occlusions<br>and<br>dilatations             | Pos. | Active<br>(Relapse) | Cortisone,<br>CYC, MTX                                           |
| 11 | 43 | Hemianopsia,<br>dizziness,<br>aphasia,<br>progressive<br>left-sided<br>hemiparesis,<br>seizures | Contrast-<br>enhanced<br>lesions<br>DBI: Neg.                  | WBC 2/3 / $\mu$ l,<br>Pro: 535 mg/l<br>intrathecal<br>IgA>IgM<br>synthesis,<br>isolated OCB<br>Cyto: No<br>pathologies          | New<br>stenosis of<br>intracranial<br>vessels, no<br>vessel<br>irregularities<br>of brain<br>vessels<br>previously | Pos. | Active<br>(Relapse) | Cortisone,<br>Aza, CYC,<br>RTX                                   |
| 12 | 47 | Headache,<br>dizziness,<br>nausea,<br>cognitive<br>deficits                                     | Multifocal<br>ischemic<br>stroke<br>lesions<br>DBI: N.p.       | WBC 76/3 / $\mu$ l,<br>Pro: 444 mg/l<br>intrathecal<br>IgG- synthesis,<br>OCB: pos.,<br>Cyto:<br>lymphomonocytic<br>pleocytosis | No<br>pathologies                                                                                                  | N.p. | Active<br>(Relapse) | Cortisone,<br>MTX                                                |
| 13 | 69 | Left-sided<br>hemiparesis,<br>cognitive<br>deficits                                             | New<br>ischemic<br>stroke on<br>the right<br>side<br>DBI: pos. | WBC 0 / $\mu$ l,<br>Pro: 522 mg/l<br>OCB: neg.,<br>Cyto: No<br>pathologies                                                      | Progressive<br>multifocal<br>irregular<br>alternating<br>stenosis/<br>occlusions<br>and<br>dilatations             | N.p. | Active<br>(Relapse) | Cortisone,<br>further<br>immunosuppressive<br>therapy<br>planned |

|    |    |                                                                                                |                                                    |                                                                                                                         |                                                                      |      |                |                     |
|----|----|------------------------------------------------------------------------------------------------|----------------------------------------------------|-------------------------------------------------------------------------------------------------------------------------|----------------------------------------------------------------------|------|----------------|---------------------|
| 14 | 49 | Cognitive deficits, dyslexia                                                                   | Contrast-enhanced lesions<br>DBI: N.p.             | WBC 6/3 / $\mu$ l,<br>Pro 798mg/l, intrathecal<br>IgG- synthesis, isolated OCB<br>Cyto: No pathologies                  | No pathologies                                                       | Pos. | Active (onset) | None                |
| 15 | 23 | Headache, encephalopathy, seizures                                                             | Multiple contrast-enhanced lesions<br>DBI: N.p.    | WBC 360/3 / $\mu$ l,<br>Pro: 1614 mg/l, intrathecal<br>IgM>IgA synthesis, OCB pos,<br>Cyto: lymphomonocytic pleocytosis | No pathologies                                                       | Pos. | Active (onset) | None                |
| 16 | 36 | Right-sided hemiparesis                                                                        | Multifocal ischemic stroke lesions<br>DBI: Pos.    | WBC 4/3 / $\mu$ l,<br>Pro 597 mg/l, OCB: neg,<br>Cyto: No pathologies                                                   | Multifocal irregular alternating stenosis/occlusions and dilatations | Neg. | Active (onset) | None                |
| 17 | 31 | Left-sided hemiparesis                                                                         | Multifocal ischemic stroke lesions<br>DBI: Pos.    | WBC 0 / $\mu$ l,<br>Prot 280 mg/l, OCB: neg.,<br>intrathec. IgM-Synthesis,<br>Cyto: No pathologies                      | Multifocal irregular alternating stenosis/occlusions and dilatations | N.p. | Active (onset) | None                |
| 18 | 44 | Headache                                                                                       | New ischemic stroke on the right side<br>DBI: pos. | WBC 1/3 / $\mu$ l,<br>663mg/l, OCB neg., Cyto: No pathologies                                                           | Multifocal irregular alternating stenosis/occlusions and dilatations | Neg. | Active (onset) | None                |
| 19 | 53 | Headache, dizziness not due to vasculitis activity                                             | No acute and new pathologies                       | WBC 1/3 / $\mu$ l,<br>Pro: 392 mg/l, OCB neg.,<br>Cyto: No pathologies                                                  | Multifocal irregular alternating stenosis/occlusions and dilatations | N.p. | Inactive       | None                |
| 20 | 61 | Residual symptoms with encephalopathy, tremor, cognitive dysfunction<br>No new, acute symptoms | No acute and new pathologies                       | WBC 0/3 / $\mu$ l,<br>Pro: 465 mg/l, Identical OCB,<br>Cyto: No pathologies                                             | Multifocal irregular alternating stenosis/occlusions and dilatations | Neg. | Inactive       | Cortisone, CYC, MTX |

Abbreviations: MRI, magnetic resonance imaging; DBI, dark blood imaging; CSF, cerebrospinal fluid; DSA, digital subtraction angiography; MRA, MR angiography; WBC, white blood cell count; Pro, protein level in the CSF; OCB, oligoclonal bands; Cyto, Cytology; Pos, positive; Neg, negative; N.p., Not performed; CYC, cyclophosphamide; RTX, rituximab; MTX, methothrexate; Aza, azathioprine. \* at time of blood draw, lumbar puncture
